# Supplementary material
Source: MDPI journal article supplement (https://www.mdpi.com/2071-1050/15/18/13975)
Supplement: s1 [file s1]

**Table S1.** Varimax-rotated principle components (PCs) of major factors affecting livestock farming due to climate change \*

| Negative effect*                                   | PC1          | PC2          | PC3           | PC4    |
|----------------------------------------------------|--------------|--------------|---------------|--------|
| Spread of diseases                                 | <b>0.823</b> | -0.242       | -0.066        | -0.071 |
| Appearance of new diseases                         | <b>0.732</b> | 0.038        | 0.361         | 0.390  |
| Use of medications and feed additives              | <b>0.870</b> | -0.160       | 0.104         | 0.112  |
| Availability of feed resources or fodder           | 0.451        | 0.420        | <b>-0.769</b> | 0.281  |
| Water shortage                                     | 0.134        | <b>0.899</b> | 0.345         | 0.373  |
| <b>Eigenvalue</b>                                  | 2.19         | 1.07         | 0.856         | 0.571  |
| <b>Percentage of variance explained</b>            | 43.85%       | 21.40%       | 17.11%        | 11.41% |
| <b>Cumulative percentage of variance explained</b> | 43.85%       | 65.24%       | 82.36%        | 93.77% |

\*Bold loadings are statistically significant based on combined data from Egyptian and Spanish respondents.

**Table S2.** Varimax rotated principle component analysis for the animals' performance as affected by climate change.

| Animal production sector*                    | PC1          | PC2          | PC3           | PC4    |
|----------------------------------------------|--------------|--------------|---------------|--------|
| Milk yield                                   | <b>0.759</b> | -0.295       | 0.198         | -0.023 |
| Meat production                              | 0.069        | <b>0.738</b> | 0.517         | 0.414  |
| Egg production                               | 0.576        | 0.363        | <b>-0.608</b> | 0.171  |
| Wool production                              | <b>0.719</b> | 0.086        | -0.138        | 0.221  |
| Reproductive efficiency                      | <b>0.727</b> | 0.000        | 0.316         | -0.455 |
| Mortality rate                               | -0.125       | <b>0.789</b> | -0.128        | -0.499 |
| <b>Eigen value</b>                           | 1.97         | 1.39         | 0.775         | 0.706  |
| <b>Proportion of variance (%)</b>            | 32.91%       | 23.21%       | 12.91%        | 11.76% |
| <b>Cumulative proportion of variance (%)</b> | 32.91%       | 56.12%       | 69.03%        | 80.79% |

\*Bold loadings are statistically significant based on combined data from Egyptian and Spanish respondents.
